# Supplementary material
Source: PubMed Central journal article supplement (PMC6158083)
Supplement: NIHMS978339-supplement-supplement_1.pdf [file NIHMS978339-supplement-supplement_1.pdf]

**Supplemental Table S1. Adjusted regression model for association of quality of life with financial harm due to someone else's drinking**

|                                    | Quality of Life     |             |
|------------------------------------|---------------------|-------------|
|                                    | Est. (SE)           | p-value     |
| Intercept                          | 3.35 (0.33)         | <0.01       |
| <b>Financial harm</b>              | <b>-0.26 (0.11)</b> | <b>0.02</b> |
| Catholic 1                         | -0.09 (0.04)        | 0.04        |
| Jewish 1                           | -0.08 (0.1)         | 0.40        |
| Muslim 1                           | -0.05 (0.15)        | 0.73        |
| Some other religion 1              | -0.1 (0.04)         | 0.02        |
| No religious preference 1          | -0.09 (0.05)        | 0.05        |
| A little affected by recession 2   | -0.14 (0.04)        | <0.01       |
| Moderately affected by recession 2 | -0.23 (0.04)        | <0.01       |
| Severely affected by recession 2   | -0.38 (0.05)        | <0.01       |
| Lived with one parent 3            | -0.08 (0.04)        | 0.05        |
| Lived with another family member 3 | -0.08 (0.08)        | 0.31        |
| Lived with someone else 3          | -0.37 (0.19)        | 0.05        |
| Mother has high school diploma 4   | 0.08 (0.04)         | 0.05        |
| Mother attended some college 4     | 0.09 (0.05)         | 0.07        |
| Mother has college degree 4        | 0.14 (0.05)         | 0.01        |
| Age                                | -0.004 (0.002)      | <0.01       |
| Moderate exercise 5                | -0.22 (0.05)        | <0.01       |
| Light exercise 5                   | -0.48 (0.05)        | <0.01       |
| No exercise 5                      | -0.57 (0.08)        | <0.01       |
| Other health status 5              | -0.36 (0.25)        | 0.15        |
| Disabled 5                         | -0.87 (0.11)        | <0.01       |
| Drunk once or twice a week 6       | 0.48 (0.27)         | 0.07        |
| Drunk three to 4 times a week 6    | 0.97 (0.35)         | 0.01        |
| Drunk once to 3 times a month 6    | 0.77 (0.25)         | <0.01       |
| Drunk less than once a month 6     | 0.79 (0.25)         | <0.01       |
| Drunk once in those 12 months 6    | 0.86 (0.25)         | <0.01       |
| Never drunk in those 12 months 6   | 0.76 (0.25)         | <0.01       |
| Obese 7                            | -0.08 (0.04)        | 0.04        |
| Overweight 7                       | 0.04 (0.04)         | 0.25        |
| Underweight 7                      | -0.23 (0.15)        | 0.11        |
| Alcohol use disorder symptoms      | -0.04 (0.02)        | 0.02        |
| High school diploma 8              | 0.22 (0.07)         | <0.01       |
| Some college 8                     | 0.27 (0.07)         | <0.01       |
| College degree 8                   | 0.35 (0.07)         | <0.01       |
| Homemaker 9                        | 0.04 (0.08)         | 0.65        |
| Retired 9                          | 0.02 (0.05)         | 0.72        |

|                                        |              |       |
|----------------------------------------|--------------|-------|
| Unemployed 9                           | -0.14 (0.07) | 0.05  |
| Other employment status 9              | -0.33 (0.07) | <0.01 |
| Family history of alcohol problems     | -0.07 (0.03) | 0.02  |
| Household of 2 persons 10              | 0.14 (0.05)  | <0.01 |
| Household of 3 persons 10              | 0.09 (0.06)  | 0.14  |
| Household of 4 persons 10              | 0.07 (0.07)  | 0.33  |
| Household of 5 persons 10              | 0.16 (0.09)  | 0.08  |
| Household of 6+ persons 10             | 0.04 (0.13)  | 0.78  |
| Income US\$10-20K 11                   | -0.13 (0.09) | 0.14  |
| Income US\$20-40K 11                   | -0.26 (0.13) | 0.05  |
| Income US\$40-60K 11                   | -0.09 (0.14) | 0.53  |
| Income US\$60-80K 11                   | -0.03 (0.15) | 0.82  |
| Income US\$80-100K 11                  | -0.07 (0.15) | 0.63  |
| Income US\$100K+ 11                    | 0.14 (0.15)  | 0.36  |
| Never married 12                       | 0.12 (0.06)  | 0.03  |
| Separated/divorced/widowed 12          | -0.02 (0.05) | 0.77  |
| Impulsivity/sensation-seeking          | 0.05 (0.02)  | 0.03  |
| Live in someone's house 13             | -0.02 (0.09) | 0.84  |
| Other living situation 13              | -0.27 (0.12) | 0.03  |
| Rent apartment 13                      | -0.06 (0.05) | 0.26  |
| Rent house 13                          | -0.07 (0.05) | 0.17  |
| No history of childhood physical abuse | 0.12 (0.04)  | 0.01  |
| No history of adult physical abuse     | 0.09 (0.04)  | 0.02  |
| Below poverty 15                       | -0.32 (0.13) | 0.01  |
| Near poor 15                           | -0.23 (0.1)  | 0.02  |
| American Indian/Alaska Native 16       | -0.24 (0.17) | 0.16  |
| Asian/Pacific Islander 16              | -0.02 (0.11) | 0.85  |
| Black/African American 16              | -0.09 (0.04) | 0.04  |
| Non-Black Hispanic/Latino 16           | -0.1 (0.05)  | 0.04  |
| Middle Atlantic 18                     | 0.1 (0.05)   | 0.04  |
| New England 18                         | 0.1 (0.09)   | 0.26  |
| North Central 18                       | 0.06 (0.05)  | 0.21  |
| Pacific 18                             | 0.08 (0.05)  | 0.14  |
| South Coast 18                         | 0.09 (0.05)  | 0.05  |
| Religion very important                | 0.14 (0.03)  | <0.01 |
| Female                                 | 0.13 (0.03)  | <0.01 |
| Racial/ethnic stigma scale             | -0.06 (0.02) | 0.02  |

## Notes:

1 Religion: Referent is Protestant (various denominations); 2 Affected by recession: Referent is "not at all"; 3 Family structure in childhood: Referent is two parents; 4 Mother's highest level of education: Referent is less than high school; 5 Level of exercise: Referent is vigorous or heavy; 6 Frequency of drunkenness: Referent is Every day or nearly every day; 7 Body mass index (BMI): Referent is normal weight; 8 Educational attainment:

Referent is less than high school; 9 Employment status: Referent is employed; 10 Household size: Referent is 1 person; 11 Annual income: Referent is less than or equal to US\$10,000; 12 Marital status: Referent is married/living with someone; 13 Living situation: Referent is house owner; 14 Number of minor children in household: Referent is none; 15 Poverty status: Coded as “near poor” if income below 150% of US federal poverty level and “in poverty” if income below 100% of poverty level, with referent as income above 150% US federal poverty level; 16 Race ethnicity: Referent is White/Caucasian; 18 Region: Referent is Dry South

**Supplemental Table S2. Adjusted regression model for association of distress with financial harm due to someone else's drinking**

|                                        | <u>OR (95% CI)</u>       | <u>p-value</u> |
|----------------------------------------|--------------------------|----------------|
| Intercept                              | 0.05 (0.02, 0.13)        | <0.01          |
| <b>Financial harm</b>                  | <b>5.77 (3.1, 10.75)</b> | <0.01          |
| Catholic 1                             | 1.18 (0.76, 1.84)        | 0.45           |
| Jewish 1                               | 1.8 (0.62, 5.21)         | 0.28           |
| Muslim 1                               | 3.84 (1.08, 13.66)       | 0.04           |
| Some other religion 1                  | 1.06 (0.68, 1.65)        | 0.81           |
| No religious preference 1              | 1.34 (0.85, 2.13)        | 0.21           |
| Moderate exercise 2                    | 0.74 (0.37, 1.52)        | 0.42           |
| Light exercise 2                       | 1.36 (0.7, 2.64)         | 0.36           |
| No exercise 2                          | 2.43 (1.11, 5.28)        | 0.03           |
| Other health status 2                  | 3.72 (0.99, 13.99)       | 0.05           |
| Disabled 2                             | 2.55 (1.15, 5.67)        | 0.02           |
| Homemaker 3                            | 1.74 (0.79, 3.84)        | 0.17           |
| Other employment status 3              | 2.13 (1.25, 3.62)        | 0.01           |
| Retired 3                              | 1.14 (0.72, 1.82)        | 0.57           |
| Unemployed 3                           | 2.26 (1.3, 3.93)         | <0.01          |
| Household of 2 persons 4               | 0.65 (0.43, 0.97)        | 0.04           |
| Household of 3 persons 4               | 1 (0.59, 1.69)           | 1.00           |
| Household of 4 persons 4               | 0.95 (0.52, 1.76)        | 0.88           |
| Household of 5 persons 4               | 0.8 (0.35, 1.83)         | 0.59           |
| Household of 6+ persons 4              | 0.36 (0.1, 1.35)         | 0.13           |
| Income US\$10-20K 5                    | 1.28 (0.79, 2.09)        | 0.32           |
| Income US\$20-40K 5                    | 1.04 (0.63, 1.74)        | 0.87           |
| Income US\$40-60K 5                    | 0.67 (0.35, 1.28)        | 0.22           |
| Income US\$60-80K 5                    | 0.61 (0.3, 1.26)         | 0.18           |
| Income US\$80-100K 5                   | 0.32 (0.12, 0.91)        | 0.03           |
| Income US\$100K+ 5                     | 0.7 (0.35, 1.41)         | 0.32           |
| No history of childhood physical abuse | 0.39 (0.28, 0.55)        | <0.01          |

## Notes:

1 Religion: Referent is Protestant (various denominations); 2 Level of exercise: Referent is vigorous or heavy;  
 3 Employment status: Referent is employed; 4 Household size: Referent is 1 person; 5 Annual income: Referent is less than or equal to US\$10,000

**Supplemental Table S3. Adjusted regression model for association of positive affect with financial harm due to someone else's drinking**

|                                    | <u>Est. (SE)</u>    | <u>p-value</u> |
|------------------------------------|---------------------|----------------|
| Intercept                          | 3.59 (0.08)         | <0.01          |
| <b>Financial harm</b>              | <b>-0.26 (0.12)</b> | <b>0.03</b>    |
| Catholic 1                         | -0.11 (0.03)        | <0.01          |
| Jewish 1                           | -0.18 (0.09)        | 0.04           |
| Muslim 1                           | -0.3 (0.2)          | 0.13           |
| Some other religion 1              | -0.03 (0.03)        | 0.32           |
| No religious preference 1          | -0.08 (0.04)        | 0.04           |
| A little affected by recession 2   | -0.01 (0.03)        | 0.66           |
| Moderately affected by recession 2 | -0.1 (0.03)         | <0.01          |
| Severely affected by recession 2   | -0.16 (0.04)        | <0.01          |
| Mother has high school diploma 3   | 0.01 (0.03)         | 0.72           |
| Mother attended some college 3     | 0.06 (0.04)         | 0.08           |
| Mother has college degree 3        | 0.07 (0.04)         | 0.05           |
| Moderate exercise 4                | -0.13 (0.03)        | <0.01          |
| Light exercise 4                   | -0.23 (0.03)        | <0.01          |
| No exercise 4                      | -0.34 (0.06)        | <0.01          |
| Other health status 4              | -0.59 (0.26)        | 0.03           |
| Disabled 4                         | -0.45 (0.07)        | <0.01          |
| Obese 5                            | 0.03 (0.03)         | 0.35           |
| Overweight 5                       | 0.07 (0.03)         | 0.02           |
| Underweight 5                      | -0.04 (0.11)        | 0.69           |
| Alcohol use disorder symptoms      | -0.05 (0.02)        | <0.01          |
| 1 drink maximum 6                  | 0.11 (0.03)         | <0.01          |
| 2 drinks maximum 6                 | 0.07 (0.04)         | 0.06           |
| 3 drinks maximum 6                 | 0.05 (0.04)         | 0.19           |
| 4 drinks maximum 6                 | 0.07 (0.05)         | 0.14           |
| 5-7 drinks maximum 6               | 0.04 (0.05)         | 0.45           |
| 8-11 drinks maximum 6              | 0.03 (0.07)         | 0.70           |
| 12-23 drinks maximum 6             | -0.02 (0.11)        | 0.87           |
| 24 or more drinks maximum 6        | 0.04 (0.22)         | 0.85           |
| Household of 2 persons 7           | 0.13 (0.03)         | <0.01          |
| Household of 3 persons 7           | 0.27 (0.07)         | <0.01          |
| Household of 4 persons 7           | 0.34 (0.1)          | <0.01          |
| Household of 5 persons 7           | 0.22 (0.17)         | 0.19           |
| Household of 6+ persons 7          | 0.2 (0.24)          | 0.41           |
| 1 child in household 8             | -0.15 (0.06)        | 0.01           |
| 2 children in household 8          | -0.25 (0.09)        | 0.01           |
| 3 children in household 8          | -0.12 (0.16)        | 0.43           |
| 4 children in household 8          | -0.1 (0.21)         | 0.64           |

|                                        |              |       |
|----------------------------------------|--------------|-------|
| 5+ children in household 8             | -0.16 (0.28) | 0.56  |
| Live in someone's house 9              | -0.2 (0.06)  | <0.01 |
| Other living situation 9               | -0.23 (0.1)  | 0.02  |
| Rent apartment 9                       | -0.06 (0.04) | 0.11  |
| Rent house 9                           | -0.01 (0.04) | 0.71  |
| No history of childhood physical abuse | 0.12 (0.04)  | <0.01 |
| No history of adult physical abuse     | 0.09 (0.03)  | <0.01 |
| American Indian/Alaska Native 10       | 0.02 (0.12)  | 0.88  |
| Asian/Pacific Islander 10              | -0.1 (0.09)  | 0.26  |
| Black/African American 10              | 0.09 (0.03)  | <0.01 |
| Non-Black Hispanic/Latino 10           | 0.08 (0.04)  | 0.03  |
| Middle Atlantic 11                     | 0.04 (0.04)  | 0.27  |
| New England 11                         | 0.04 (0.07)  | 0.58  |
| North Central 11                       | -0.03 (0.04) | 0.41  |
| Pacific 11                             | 0.1 (0.04)   | 0.01  |
| South Coast 11                         | 0.04 (0.03)  | 0.23  |
| Religion very important                | 0.09 (0.03)  | <0.01 |
| Racial/ethnic stigma scale             | -0.05 (0.02) | 0.01  |

## Notes:

1 Religion: Referent is Protestant (various denominations); 2 Affected by recession: Referent is "not at all"; 3 Mother's highest level of education: Referent is less than high school; 4 Level of exercise: Referent is vigorous or heavy; 5 Body mass index (BMI): Referent is normal weight; 6 Maximum drinking in past year: Referent 0 drinks; 7 Household size: Referent is 1 person; 8 Number of minor children in household: Referent is none; 9 Living situation: Referent is house owner; 10 Race ethnicity: Referent is White/Caucasian; 11 Region: Referent is Dry South

**Supplemental Table S4. Adjusted regression model for association of distress with being assaulted or physically harmed by someone who had been drinking**

|                                         | <u>OR (95% CI)</u>      | <u>p-value</u> |
|-----------------------------------------|-------------------------|----------------|
| Intercept                               | 0.07 (0.02, 0.24)       | <0.01          |
| <b>Any assault/physical harm</b>        | <b>2.4 (1.44, 4.01)</b> | <0.01          |
| Moderate exercise 1                     | 0.86 (0.42, 1.78)       | 0.69           |
| Light exercise 1                        | 1.46 (0.73, 2.93)       | 0.28           |
| No exercise 1                           | 2.54 (1.12, 5.77)       | 0.03           |
| Other health status 1                   | 4.31 (1.17, 15.87)      | 0.03           |
| Disabled 1                              | 2.81 (1.22, 6.48)       | 0.02           |
| Black/African American 2                | 1.34 (0.55, 3.29)       | 0.52           |
| Hispanic/Latino 2                       | 1.2 (0.48, 3.02)        | 0.70           |
| White/Caucasian 2                       | 2.09 (0.87, 5.05)       | 0.10           |
| College degree 3                        | 0.7 (0.4, 1.22)         | 0.21           |
| High school diploma 3                   | 0.56 (0.35, 0.91)       | 0.02           |
| Some college 3                          | 0.75 (0.46, 1.23)       | 0.25           |
| Homemaker 4                             | 1.8 (0.8, 4.04)         | 0.16           |
| Other employment status 4               | 1.98 (1.2, 3.28)        | 0.01           |
| Retired 4                               | 0.96 (0.62, 1.5)        | 0.86           |
| Unemployed 4                            | 2.26 (1.33, 3.84)       | <0.01          |
| Household size (count)                  | 0.57 (0.39, 0.82)       | <0.01          |
| Income US\$100K+ 5                      | 0.77 (0.35, 1.68)       | 0.51           |
| Income US\$10-20K 5                     | 1.28 (0.79, 2.07)       | 0.31           |
| Income US\$20-40K 5                     | 1.09 (0.65, 1.83)       | 0.73           |
| Income US\$40-60K 5                     | 0.75 (0.4, 1.44)        | 0.39           |
| Income US\$60-80K 5                     | 0.61 (0.29, 1.31)       | 0.21           |
| Income US\$80-100K 5                    | 0.29 (0.08, 1.03)       | 0.06           |
| No marijuana use in past year 6         | 0.6 (0.36, 0.98)        | 0.04           |
| Occasional marijuana use in past year 6 | 0.67 (0.26, 1.72)       | 0.40           |
| Number of children in household         | 1.83 (1.23, 2.73)       | <0.01          |
| No history of childhood physical abuse  | 0.47 (0.33, 0.66)       | <0.01          |

## Notes:

1 Level of exercise: Referent is vigorous or heavy; 2 Race/ethnicity: Referent is "other"; 3 Educational attainment: Referent is less than high school; 4 Employment status: Referent is employed; 5 Annual income: Referent is less than or equal to US\$10,000; 6 Marijuana use in past year: Referent is frequent use

**Supplemental Table S5. Adjusted regression model for association of distress with being assaulted or physically harmed by spouse or family member who had been drinking**

|                                        | <u>OR (95% CI)</u>      | <u>p-value</u> |
|----------------------------------------|-------------------------|----------------|
| Intercept                              | 0.06 (0.02, 0.23)       | <0.01          |
| <b>Spouse/family assault</b>           | <b>3.77 (1.9, 7.48)</b> | <0.01          |
| Catholic 1                             | 1.58 (0.96, 2.59)       | 0.07           |
| Jewish 1                               | 2.01 (0.71, 5.7)        | 0.19           |
| Muslim 1                               | 3.5 (0.84, 14.64)       | 0.09           |
| Some other religion 1                  | 1.14 (0.71, 1.83)       | 0.59           |
| No religious preference 1              | 1.49 (0.91, 2.44)       | 0.11           |
| Moderate exercise 2                    | 0.78 (0.37, 1.65)       | 0.52           |
| Light exercise 2                       | 1.34 (0.65, 2.76)       | 0.43           |
| No exercise 2                          | 2.45 (1.04, 5.76)       | 0.04           |
| Other health status 2                  | 3.47 (0.74, 16.35)      | 0.12           |
| Disabled 2                             | 2.56 (1.08, 6.08)       | 0.03           |
| Black/African American 3               | 1.44 (0.55, 3.78)       | 0.46           |
| Hispanic/Latino 3                      | 0.81 (0.28, 2.31)       | 0.70           |
| White/Caucasian 3                      | 2.21 (0.86, 5.71)       | 0.10           |
| Obese 4                                | 0.82 (0.54, 1.24)       | 0.34           |
| Overweight 4                           | 0.6 (0.38, 0.93)        | 0.02           |
| Underweight 4                          | 1.99 (0.69, 5.72)       | 0.20           |
| High school diploma 5                  | 0.46 (0.28, 0.76)       | <0.01          |
| Some college 5                         | 0.61 (0.37, 1.02)       | 0.06           |
| College degree 5                       | 0.59 (0.33, 1.07)       | 0.08           |
| Homemaker 6                            | 2.22 (0.95, 5.17)       | 0.06           |
| Other employment status 6              | 2.12 (1.23, 3.65)       | 0.01           |
| Retired 6                              | 0.96 (0.6, 1.54)        | 0.86           |
| Unemployed 6                           | 2.01 (1.12, 3.63)       | 0.02           |
| Household size (count)                 | 0.58 (0.39, 0.86)       | 0.01           |
| Income US\$100K+ 7                     | 0.72 (0.31, 1.71)       | 0.46           |
| Income US\$10-20K 7                    | 1.45 (0.87, 2.4)        | 0.15           |
| Income US\$20-40K 7                    | 1.21 (0.7, 2.1)         | 0.50           |
| Income US\$40-60K 7                    | 0.75 (0.37, 1.52)       | 0.43           |
| Income US\$60-80K 7                    | 0.58 (0.26, 1.33)       | 0.20           |
| Income US\$80-100K 7                   | 0.31 (0.09, 1.08)       | 0.07           |
| Number of children in household        | 1.8 (1.18, 2.76)        | 0.01           |
| No history of childhood physical abuse | 0.57 (0.38, 0.86)       | 0.01           |
| No history of adult physical abuse     | 0.55 (0.37, 0.8)        | <0.01          |

## Notes:

1 Religion: Referent is Protestant (various denominations); 2 Level of exercise: Referent is vigorous or heavy; 3 Race/ethnicity: Referent is "other"; 4 Body mass index (BMI): Referent is normal weight; 5 Educational attainment: Referent is less than high school; 6 Employment status: Referent is employed; 7 Annual income: Referent is less than or equal to US\$10,000
